# Supplementary material for: Effects of Mesenchymal Stem Cell-Derived Exosomes on Experimental Autoimmune Uveitis
Source: PubMed Central journal article supplement (PMC5489510; doi:10.1038/s41598-017-04559-y), 2017-06-28
Supplement: 41598_2017_4559_MOESM1_ESM.pdf [file 41598_2017_4559_MOESM1_ESM.pdf]

**Effects of Mesenchymal Stem Cell-Derived Exosomes on  
Experimental Autoimmune Uveitis**

Lingling Bai<sup>1</sup>, Hui Shao<sup>2</sup>, Hongxing Wang<sup>3</sup>, Zihui Zhang<sup>1</sup>, Chang Su<sup>1</sup>,  
Lijie Dong<sup>1</sup>, Bo Yu<sup>1</sup>, Xiteng Chen<sup>1</sup>, Xiaorong Li<sup>1\*</sup>, Xiaomin Zhang<sup>1\*</sup>

<sup>1</sup>Tianjin Medical University Eye Hospital, Eye Institute & School of  
Optometry and Ophthalmology

<sup>2</sup>Department of Ophthalmology and Visual Sciences, Kentucky Lions Eye  
Center, University of Louisville

<sup>3</sup>Department of Ophthalmology, Chuiyangliu Hospital, Beijing.

Correspondence and requests for materials should be addressed to:  
Xiaomin Zhang (email: xiaomzh@126.com) or Xiaorong Li (email:  
lixiaorong@tmu.edu.cn)

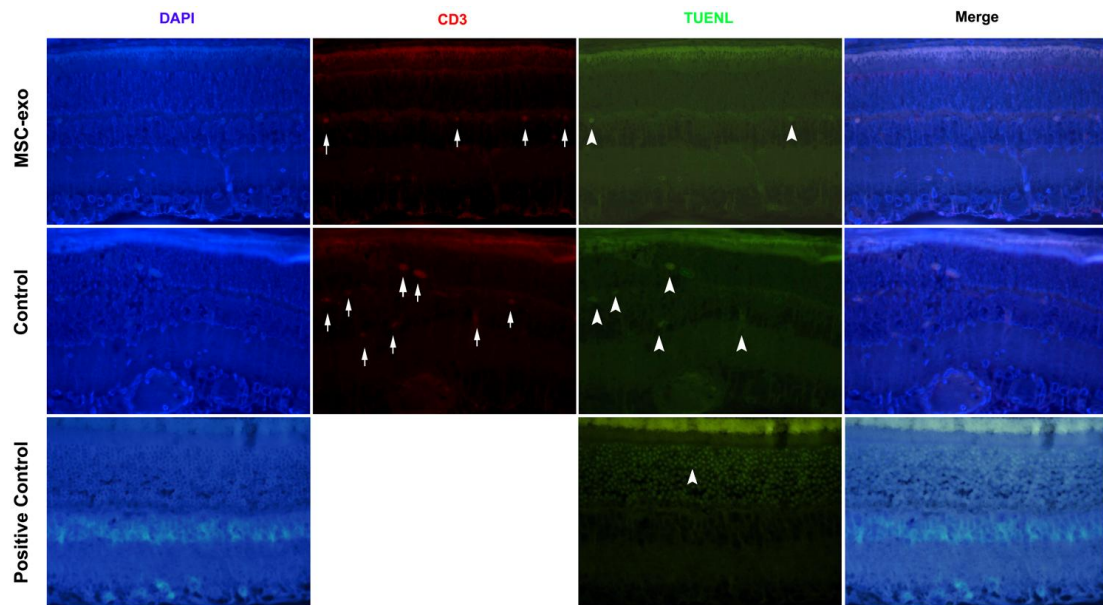

**Supplementary figure: CD3 and TUENL double-fluorescence**

co-localization analysis of T cells apoptosis in the eyes. Blue is the cell nucleus, red indicates T cells (arrows), and green labels apoptosis (arrowheads). For positive control, fixed and permeabilized tissues were incubated with DNase I recombinant for 10 min at room temperature to induce DNA strand breaks.
